1 Carbon sink services for tropical coastal seagrass are far lower than  
2 anticipated when accounting for black carbon

3 John B. Gallagher<sup>1,2,3</sup>, Chuan Chee Hoe<sup>4</sup> Yap Tzuen-Kiat<sup>3</sup>, and Farahain W<sup>3</sup>

4 <sup>1</sup>Centre for Marine and Coastal studies, Universiti Sains Malaysia, 11800, Pinang, Malaysia

5 <sup>2</sup>Institute for Marine and Antarctic Studies, University of Tasmania, 7000, Tasmania,  
6 Australia

7 <sup>3</sup>Borneo Marine Research Institute, Universiti Malaysia Sabah, 88400, Sabah, Malaysia

8 <sup>4</sup>Faculty of Science and Natural Resources, Universiti Malaysia Sabah, 88400, Sabah,  
9 Malaysia

10

11 Key words: pyrogenic carbon, blue carbon, seagrass, sediments, tropical

12

13 Valuing the sedimentary ‘blue carbon’ stocks of seagrass meadows in mitigating greenhouse  
14 gas emissions requires the exclusion of allochthonous recalcitrant forms, such as black  
15 carbon (BC) from the stock assessment. Regression models constructed across a tropical  
16 estuary predicted that carbon sinks within the more abundant sandy meadows of coastal bays  
17 likely support a significant but modest BC fraction. We tested the prediction by measuring  
18 BC fractions of total organic carbon (TOC) across three coastal meadows of the same region.  
19 One patchy meadow was located close to a major urban centre while the remaining two  
20 continuous meadows were contained in separate open embayments of a rural marine park,  
21 differing in fetch and species. In all cases, the BC/TOC fractions were significantly greater  
22 than predicted constituting a major component of the organic carbon content,  $28\% \pm 1.6$ , and  
23  $26\% \pm 4.9$  to  $36\% \pm 1.5$  ( $\pm 95\%$  confidence intervals) for urban and marine park meadows  
24 respectively. The higher BC/TOC fractions were explained by site-specific variability in BC

25 atmospheric supply, patchy coverage, and a presumed increase in the loss of seagrass litter, as  
26 determined by the canopy height and proximity to the meadows exposed edge.

27

## 28 Introduction

29 The realisation that anthropogenic emissions of CO<sub>2</sub> is effecting climate change has  
30 highlighted the importance of quantifying and managing existing sedimentary organic carbon  
31 stocks, buried and protected from remineralisation. Lately, there has been a focus on ‘blue  
32 carbon’ reservoirs. These ecosystems are the seagrass, saltmarsh, mangrove, and macro-algae  
33 (1, 2). Of the four, seagrass ecosystems remain better placed to augment their organic carbon  
34 stocks. Coastal seagrass meadows filter out organic detritus washed out across intertidal and  
35 terrestrial landscapes and sequester them within their sediments (3), which would otherwise  
36 be mineralised across the continental shelf (4).

37 Chew and Gallagher (5), however, challenged the traditional biogeochemistry mass  
38 balance concept of carbon storage. They argued that because recalcitrant organic carbon  
39 produced outside an ecosystem does not require protection from remineralisation, then their  
40 presence within sediments cannot be counted as a burial service in the mitigation of  
41 greenhouse gas emissions. Black carbon (BC) is an example of an ‘allochthonous  
42 recalcitrant’. It is formed during the incomplete combustion of biomass and fossil fuels, of  
43 which SE Asia is a global hotspot (6). Its supply to seagrass meadow sediments can be both  
44 through atmospheric deposition and with soil washout (5). However, the black carbon content  
45 of coastal seagrass sediments is unknown. Nonetheless, estimates of its importance to the  
46 total organic carbon content (TOC) have been made from a tropical estuarine system, of  
47 around  $18 \pm 3\%$  ( $\pm 95\%$  confidence interval) within tropical regions located around Sabah  
48 (Malaysia) (5). While the BC/TOC fraction was significant, if not moderate, the equivalence  
49 may have be confounded. Within the confines of a tide-dominated estuary, the BC fraction

50 could be reduced by a sizeable fraction, due to the lost seagrass litter returned on the flood  
51 tide. Contrast this with coastal seagrass meadows, which lose a large fraction of its litter to  
52 the coastal shelf across the whole meadow or close to their exposed boundary (7-9). It is also  
53 plausible that the narrow entrance could restrict BC supply from coastal bare sediments by  
54 persistent onshore winds (Monsoons). Taken together, these two factors could inflate coastal  
55 seagrass sedimentary BC/TOC fractions over that of their sandier estuarine analogues. This  
56 study sets out to test the prediction and the possible confounding factors by measuring the  
57 surface sedimentary BC and TOC contents across three subtidal (0.5-1 m) tropical seagrass  
58 meadows and adjacent bare sediments of same region.

59

## 60 Materials and Methods

61 The study was conducted within the rural Tun Mustapha Marine Park, and the urban  
62 Sepanggar Bay, which contains a major shipping port. Both locations are in North Borneo  
63 (Sabah, Malaysia) (electronic supplementary material, figure S1). The two Marine Park  
64 seagrass meadows Limau-Limauan (LL) and Bak-Bak (BB) supported continuous meadows.  
65 The BB meadow, contained a mix of smaller canopy pioneer species, *Cymodocea rotundata*  
66 and *Halodule pinifolia*, consistent with a relatively more energetic environ, over that of the  
67 LL meadow, dominated by a large leafed climax species, *Enhalus acoroides* (10). In contrast,  
68 the Sepanggar Bay meadow near ODEC beach (OD) was patchy and reminiscent of a  
69 degraded system. The meadow supported a mixed bed species of mainly pioneer forms,  
70 *Cymodocea serrulata*, *Halodule uninervis*, and *Halophila ovalis*, with only isolated small  
71 stands of *E. acroides*.

72 Across each meadow, the first 1 cm of sediment was taken haphazardly within a 25  
73 cm<sup>2</sup> quadrat for BC and TOC contents. Quadrats were laid down every 5 m along two parallel  
74 50 m transects perpendicular to the exposed boundary of a prevailing Monsoon

75 (Supplementary Figure S1). Along with BC and TOC, a range of sedimentological and  
76 seagrass biological variables were also measured within each quadrat (table 1). Samples of  
77 bare sediments were also taken for BC and TOC contents. The sites were selected away from  
78 adjacent shallow banks of coral rubble, and windward to the prevailing Monsoon, along with  
79 an additional 10 samples along the central channel adjacent to seagrass meadows of Salut–  
80 Mengkabong estuary. For details of sample treatment, sediment particle size distribution and  
81 analysis of TOC and BC as measured using a gravimetric chemo-thermal oxidation protocol  
82 can be found elsewhere (5). All statistical analysis, ANOVA, ANCOVA, median and  
83 quartiles and SE, were calculated in PAST™ after confirming normality of data distributions.  
84

## 85 Results

86 Overall, BC represented a significantly larger fraction of the TOC than was found across the  
87 upper silty/mud and lower silty/sand sediments of the estuary Salut–Mengkabong (figure 1).  
88 Furthermore, it appeared that the difference was also reflected in the BC/TOC fractions  
89 across their adjacent bare sediments. For BB and LL, their BC/TOC variability was not  
90 reflected in smaller TOC contents found across transects closer to the exposed edge of their  
91 meadows (figure 2a). That is to say, there was a similar linear response of BC to increases in  
92 TOC across the BB and LL meadows, and both linear responses supported near zero  
93 intercepts (figure 2b). Although, it should be noted, that there was a greater difference in the  
94 mean TOC between the transects of the larger canopy LL meadow over that of BB (figure  
95 2a), for similar coverages (table 1). Furthermore, BB had on average 2.4 times higher  
96 sedimentary TOC contents than LL, which was not reflected in a higher silt/clay fraction  
97 (table 1). In contrast, there was no differences for both the average sedimentary TOC and BC  
98 between the inner and exposed transects of the patchy meadow at OD. Instead, most of the  
99 variance was contained across the transect's TOC resulting in a relatively invariant response

100 with BC content (figure 2b). It should also be noted that the mean particle sizes within the  
101 patch stands at OD were much greater and not smaller than found in adjacent bare patches of  
102 the meadow of  $8.1\mu\text{m} \pm 2.4$  and  $107.5\mu\text{m} \pm 19.0$  ( $\pm 95\%$  CI) respectively (analysed from  
103 electronic supplementary material, table S1).

104

## 105 Discussion

106 As expected, the sedimentary TOC content was less along the outer more exposed  
107 transects for both LL and BB meadows. We believe that falling rates of resuspension and  
108 subsequent oxidisation closer to the exposed meadows edge is not a likely explanation (4).  
109 There was a near doubling of seagrass coverage, and presumably their root's ability to bind  
110 sediments (11), across the inner transect of BB, and not for LL (table 1). Loss of TOC by  
111 resuspension would then result in greater and not smaller differences in sedimentary TOC  
112 contents between inner and outer transects of BB over that of LL (figure 2a). Neither can  
113 contributions of BC from adjacent bare sediments explain the data patterns. Firstly, net  
114 deposition of these sediments is likely to be greater across the inner transects, as turbulence is  
115 increasingly attenuated (12). This should reduce and not increase the inner transects TOC  
116 contents. Secondly, a model that describes increases in BC with TOC, which converges  
117 towards a positive TOC intercept close to its origin, is more consistent with additional  
118 organic carbon not associated with BC. A more likely alternative for the inter and intra  
119 meadow differences in TOC is a greater reduction in turbulence and loss of litter across the  
120 meadow, by the larger LL canopy species (12) (table 1).

121 The OD meadow variance in both TOC, its relationship to BC and sedimentology  
122 appears to illustrate a separate circumstance over the more continuous and rural meadows.  
123 The larger mean sediment particle sizes within the patch stands over the bare regions of the  
124 OD meadow (see Results section), would imply a seemingly inconsistent greater and not

125 smaller amount of turbulence within the canopy. This has been reported or similar small  
126 patchy distributions, where the increased amount of turbulence comes from the less  
127 restrictive movement of the seagrass canopy (13). How this affected the variance was  
128 unclear. Nonetheless, the relative high TOC, possibly the result of a more eutrophic polluted  
129 environ may have tempered increases in BC/TOC fraction. Either way, the invariance of BC  
130 with TOC suggests that the supply of BC was ostensibly over a larger scale, consistent with  
131 atmospheric deposition (5).

132

### 133 Conclusion

134 The study demonstrated that BC, an allochthonous recalcitrant form, can represent a  
135 major fraction of the sediment content of coastal seagrass meadows and lead to significant  
136 overestimates of their carbon sink services. Furthermore, it appears that the size of seagrass  
137 canopy species and not coverage maybe a better predictor of the extent of the BC  
138 contribution to the sedimentary TOC than the an expected increase in the amount of BC  
139 emitted for a urban environ, when covariant with eutrophication. We thus, recommend we  
140 move forward away from a simple mass balance approach to one that includes stability and  
141 origin by incorporating the concept of allochthonous recalcitrance.

142

143 Data accessibility. Supporting data and figures can be found in the electronic supplementary  
144 material

145 Author contributions. All the authors assisted in fieldwork and analysis of the samples. J.B.G.  
146 conceived the program and led the writing of the manuscript. C.C.H. compiled the  
147 supplemental material, and the statistical analysis set within Table 1. All the authors approve  
148 the final version of the manuscript and agree to be accountable for all aspects of the  
149 manuscript.

150 Competing interests. We declare we have no competing interests

151 Funding. Provided by Sabah Park's Tun Mustapha Park Scientific Expedition (SDK0006-

152 2017), and from the Ministry of Science Technology and Innovation (FRGS0424-SG-

153 1/2015).

154

155 Figure 1. The BC/TOC fractions for seagrass sediments of upper (SMU), and lower (SML)

156 Salut–Mengkabong Estuary, the coastal seagrass meadows at ODEC beach Sepanggar Bay

157 (OD), Bak-Bak (BB) and Limau-Limauan (LL). BSM, BOD and BLB are the fraction from

158 bare sediments outside of the meadows within the estuary, OD, and LL and BB (combine)

159 respectively. The box plot represents the median, 25% and 75% quartiles, 95% confidence

160 limits and outliers. Data for SMU and SML was compiled from Supplementary material (5)

161 in accordance to Open Access licence <http://creativecommons.org/licenses/by/4.0/>.

162

163 Figure 2. The upper graph **a**, shows the total organic carbon content (TOC) and black carbon

164 (BC) contents of ODEC beach in Sepanggar Bay(OD), Bak Bak (BB), and Limau Limauan

165 (LL), average across their inner and outer meadow transects. The error bars represent their

166 95% confidence limits. The lower graph **b**, are the ordinary least squares regressions for BC

167 with TOC. Significant differences between transect TOC and BC means could be found for

168 LL ( $P < 0.05$ ,  $P < 0.05$ ) and BB ( $P < 0.07$ ,  $P < 0.05$ ) respectively. The probability of the

169 regression intercepts and slopes between BB and LL are being the same was statistically

170 significant (ANCOVA  $P > 0.38$ ).

171

172

173 Table 1. Mean and standard errors of TOC and BC surface sediment contents (as dry mass),  
174 along with their seagrass canopy and sediment parameters for the three Sabahan seagrass  
175 meadows (Malaysia).

176

| Seagrass meadow | n  | TOC (%)            | BC (%)             | BC/TOC (%)          | Coverage (%) | Canopy (cm)       | Particle Size ( $\mu\text{m}$ ) | Silt/clay (%)       |
|-----------------|----|--------------------|--------------------|---------------------|--------------|-------------------|---------------------------------|---------------------|
| ODEC Beach      | 22 | 1.07<br>$\pm 0.04$ | 0.29<br>$\pm 0.01$ | 27.97<br>$\pm 0.76$ | 10 $\pm$ 3   | 5.8<br>$\pm 1.7$  | 110.22<br>$\pm 3.97$            | 8.98<br>$\pm 0.96$  |
| Bak-Bak         | 22 | 0.71<br>$\pm 0.02$ | 0.26<br>$\pm 0.01$ | 35.66<br>$\pm 0.74$ | 42 $\pm$ 6   | 3.8<br>$\pm 0.6$  | 132.30<br>$\pm 1.83$            | 4.09<br>$\pm 0.18$  |
| Limau-Limauan   | 22 | 0.30<br>$\pm 0.04$ | 0.08<br>$\pm 0.02$ | 26.13<br>$\pm 2.37$ | 33 $\pm$ 5   | 11.5<br>$\pm 1.3$ | 74.82<br>$\pm 4.65$             | 17.14<br>$\pm 2.95$ |

177

## 178 References

- 179 1. McLeod E, Chmura GL, Bouillon S, Salm R, Björk M, Duarte CM, et al. A blueprint  
180 for blue carbon: Toward an improved understanding of the role of vegetated coastal habitats  
181 in sequestering CO<sub>2</sub>. *Frontiers in Ecology and the Environment*. 2011;9(10):552-60.
- 182 2. Hill R, Bellgrove A, Macreadie PI, Petrou K, Beardall J, Steven A, et al. Can  
183 macroalgae contribute to blue carbon? An Australian perspective. *Limnology and*  
184 *Oceanography*. 2015;60(5):1689-706.
- 185 3. Kennedy H, Beggins J, Duarte CM, Fourqurean JW, Holmer M, Marba N, et al.  
186 Seagrass sediments as a global carbon sink: Isotopic constraints. *Global Biogeochemical*  
187 *Cycles*. 2010;24.
- 188 4. Cathalot C, Rabouille C, Tisnérat-Laborde N, Toussaint F, Kerhervé P, Buscail R, et  
189 al. The fate of river organic carbon in coastal areas: A study in the Rhône River delta using  
190 multiple isotopic ( $\delta^{13}\text{C}$ ,  $\delta^{14}\text{C}$ ) and organic tracers. *Geochimica Et Cosmochimica Acta*.  
191 2013;118:33-55.



- 192 5. Chew ST, Gallagher JB. Accounting for black carbon lowers estimates of blue carbon  
193 storage services. *Scientific reports*. 2018;8(1):2553.
- 194 6. Gaveau DLA, Salim MA, Hergoualc'h K, Locatelli B, Sloan S, Wooster M, et al.  
195 Major atmospheric emissions from peat fires in Southeast Asia during non-drought years:  
196 evidence from the 2013 Sumatran fires. *Scientific reports*. 2014;4:6112.
- 197 7. Chiu S-H, Huang Y-H, Lin H-J. Carbon budget of leaves of the tropical intertidal  
198 seagrass *Thalassia hemprichii*. *Estuarine, Coastal and Shelf Science*. 2013;125:27-35.
- 199 8. Ricart AM, Ricart AM, Dalmau A, Perez M, Romero J. Effects of landscape  
200 configuration on the exchange of materials in seagrass ecosystems.
- 201 9. Portillo E. Relation between the type of wave exposure and seagrass losses  
202 (*Cymodocea nodosa*) in the south of Gran Canaria (Canary Islands — Spain). *Oceanological  
203 and Hydrobiological Studies*. 2014;43(1):29-40.
- 204 10. Kilminster K, McMahon K, Waycott M, Kendrick G, Scanes P, McKenzie L, et al.  
205 Unravelling complexity in seagrass systems for management: Australia as a microcosm 2015.
- 206 11. Christianen MJA, van Belzen J, Herman PMJ, van Katwijk MM, Lamers LPM, van  
207 Leent PJM, et al. Low-Canopy Seagrass Beds Still Provide Important Coastal Protection  
208 Services. *PLoS ONE*. 2013;8(5).
- 209 12. Fonseca MS, Cahalan JA. A preliminary evaluation of wave attenuation by four  
210 species of seagrass. *Estuarine, Coastal and Shelf Science*. 1992;35(6):565-76.
- 211 13. van Katwijk MM, Bos AR, Hermus DCR, Suykerbuyk W. Sediment modification by  
212 seagrass beds: Muddification and sandification induced by plant cover and environmental  
213 conditions. *Estuarine, Coastal and Shelf Science*. 2010;89(2):175-81.
- 214

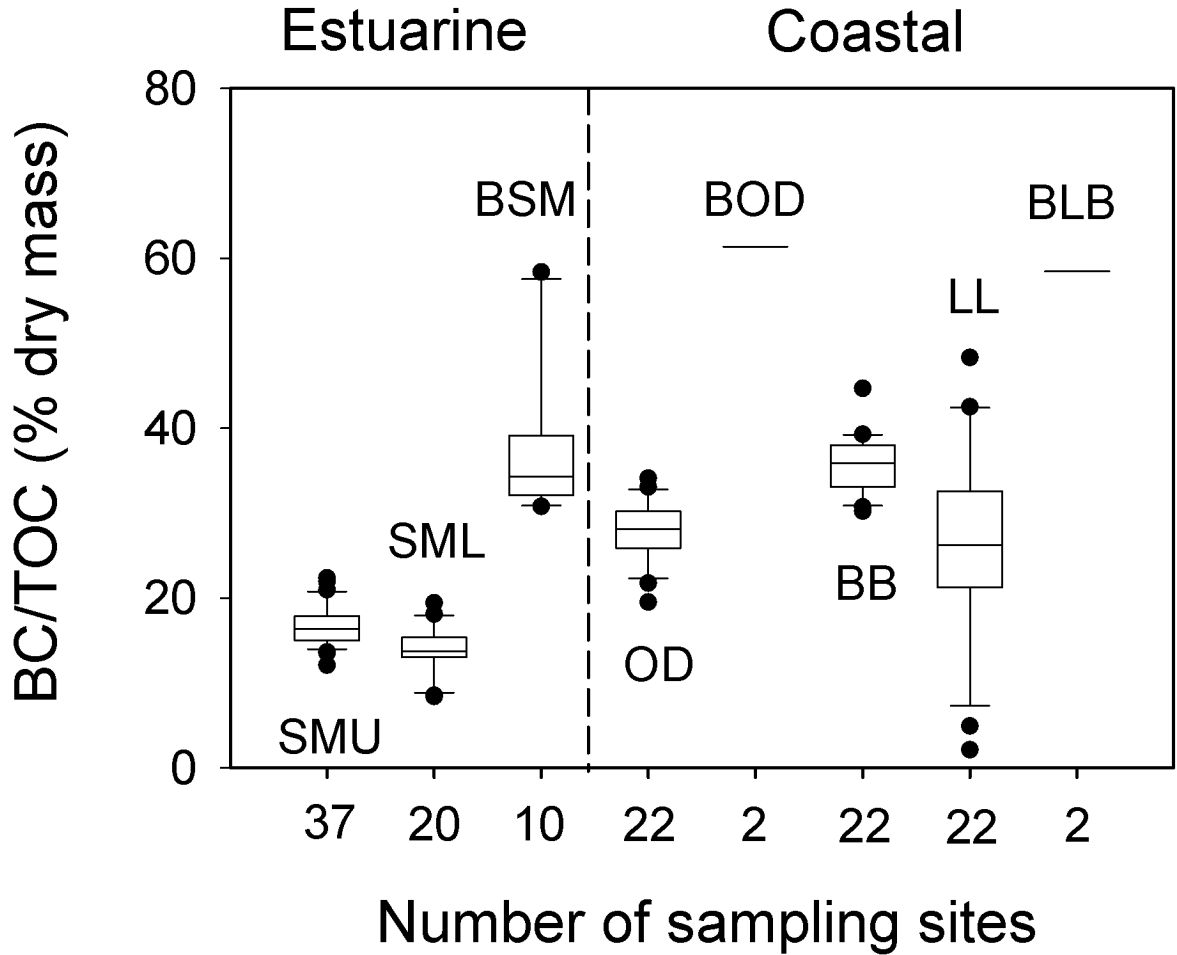

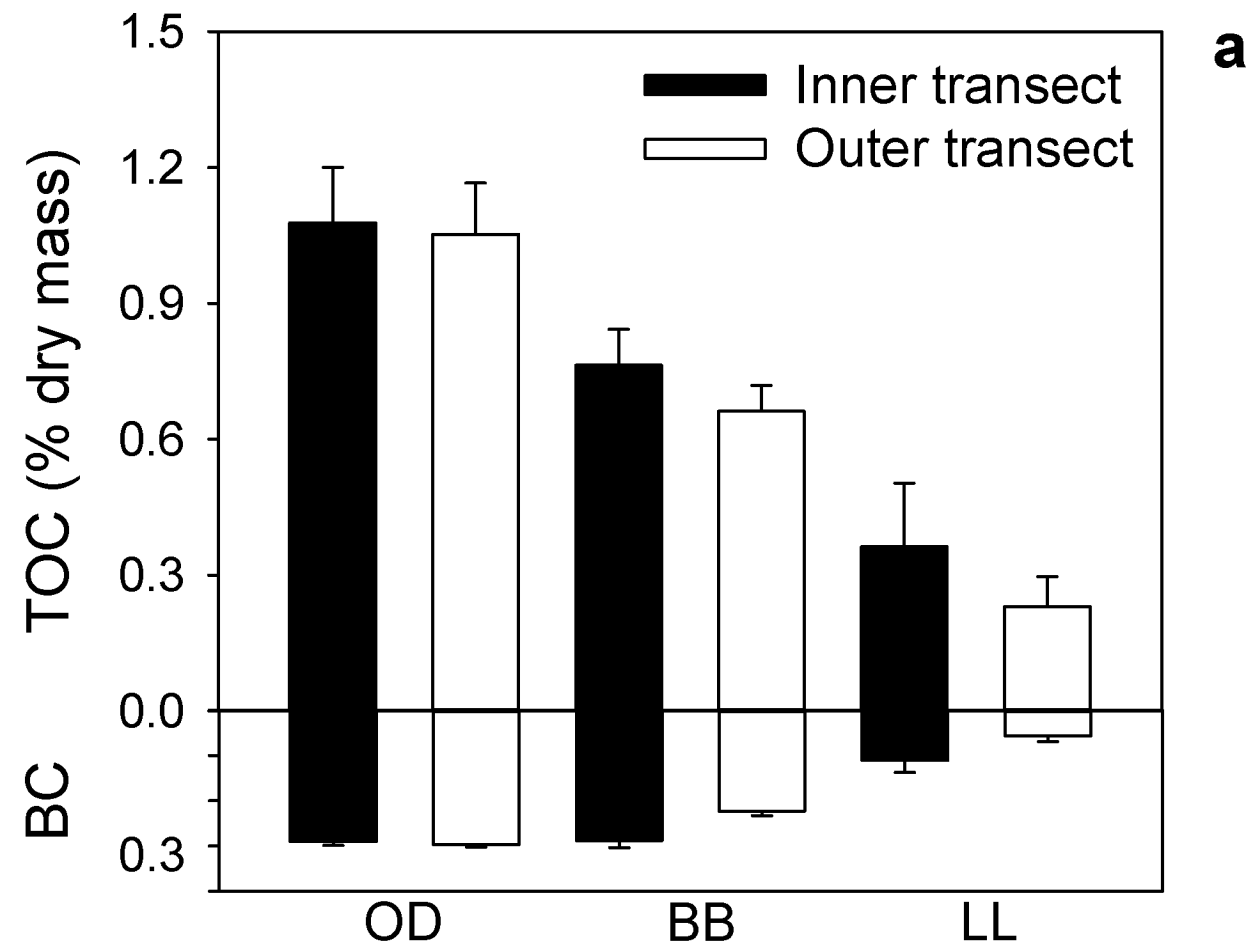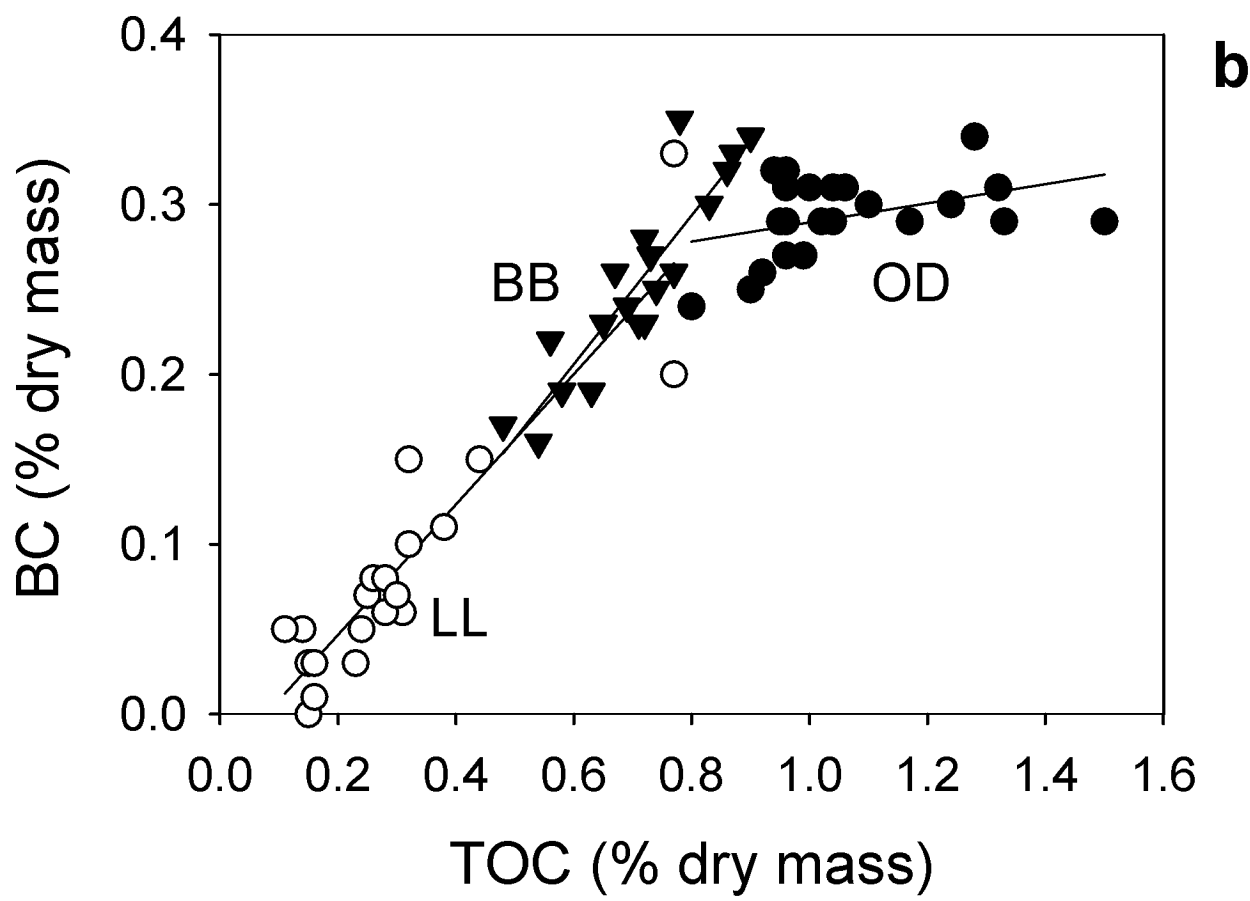

Source: https://www.biorxiv.org/content/10.1101/493262v1.full.pdf
